# Supplementary material for: Pancreatic cancer-derived exosomes transfer miRNAs to dendritic cells and inhibit RFXAP expression via miR-212-3p
Source: PubMed Central journal article supplement (PMC4745769; doi:10.18632/oncotarget.4924), 2015-08-14
Supplement: oncotarget-06-29877-s001.pdf [file oncotarget-06-29877-s001.pdf]

## SUPPLEMENTARY TABLES

**Supplementary Table S1: fold change of gene expression between exosome-stimulated DCs (exo-iDC) and untreated DCs (iDC)**

**Supplementary Table S2: MiRNA-mRNA interaction network**

| miR-188-5p | miR-203    | miR-202-3p | miR-101-3p | miR-139-5p | miR-212-3p | miR-210 | miR-424-5p | miR-9-5p   |
|------------|------------|------------|------------|------------|------------|---------|------------|------------|
| ANKRD29    | AHCTF1     | AHCTF1     | ARHG AP11A | BBS7       | ANKRD29    | ANKRD29 | AHCTF1     | ARHG AP11A |
| ARHG AP11A | ANKRD29    | BTF3L4     | BBS7       | BTF3L4     | ARHG AP11A | EPB41L5 | ANKRD29    | AS3MT      |
| BOLA1      | ARHG AP11A | CAMK2D     | C18orf32   | CAMK2D     | BBS7       | ETV1    | ARHG AP11A | BBS7       |
| BTF3L4     | BBS7       | CC2D2A     | CAMK2D     | CC2D2A     | CAMK2D     | FANCF   | BTF3L4     | BTF3L4     |
| C11orf63   | BTF3L4     | CREM       | CREM       | CREM       | CC2D2A     | GPD2    | CAMK2D     | CCDC140    |
| CC2D2A     | C11orf63   | CXorf23    | CXCL11     | CXCL11     | CXorf23    | MICAL3  | CC2D2A     | CHMP7      |
| DNAJB4     | C18orf32   | DCN        | CXorf23    | CXorf23    | DST        | NFAT5   | CCDC83     | CREM       |
| DST        | CAMK2D     | DKK1       | DKK1       | DCN        | EID2B      | NLGN4Y  | COPS2      | CXCL11     |
| EFNA1      | CCDC83     | DST        | DST        | DNAJB4     | EPB41L5    | NUFIP2  | CREM       | DST        |
| EIF2AK3    | CFH        | DUSP1      | DUSP1      | DST        | ETV1       | PRDX2   | CXorf23    | DUSP1      |
| EPB41L5    | CHMP7      | DYNC2LI1   | DYNC2LI1   | DUSP1      | EXOC1      | RNF149  | DNAJB4     | EFNA1      |
| ETV1       | CREM       | EIF2AK3    | EFNA1      | DYN C2LI1  | FAM63A     | SEC24B  | DST        | EID2B      |
| FAM63A     | CXCL11     | EPB41L5    | EPB41L5    | EIF2AK3    | FCGR2B     | SLC8A3  | EIF2AK3    | FAM63A     |
| FXYD4      | CXorf23    | GIPC2      | ETV1       | EPB41L5    | FXYD4      | VASP    | EPB41L5    | FANCF      |
| GAS2L2     | DBR1       | KANK1      | EXOC1      | EXOC1      | GPD2       |         | ETV1       | GPD2       |
| GIPC2      | DCN        | KCNG3      | FAM63A     | FAM63A     | KCNG3      |         | EXOC1      | KANK1      |
| GPD2       | DKK1       | LDHAL6B    | GPD2       | GPD2       | MICAL3     |         | FAM63A     | KLF4       |
| KCNG3      | DNAJB4     | MID1       | KANK1      | IFT81      | MOSPD1     |         | GIPC2      | MEFV       |
| MEFV       | DST        | NFAT5      | KCNG3      | KCNG3      | NFAT5      |         | GPD2       | MICAL3     |
| MICAL3     | DUSP1      | NRCAM      | MEFV       | MBD2       | NLGN4Y     |         | KANK1      | MID1       |
| MOSPD1     | DYNC2LI1   | OPRM1      | MGST1      | MESP2      | NRCAM      |         | KCNG3      | NLGN4Y     |
| NFAT5      | EID2B      | PRDM11     | MID1       | MICAL3     | NT5C3      |         | KLF4       | NRCAM      |
| NRCAM      | EPB41L5    | RPGRIP1L   | MOSPD1     | MOSPD1     | NUFIP2     |         | MEFV       | NT5C3      |
| NUDCD1     | ETV1       | SDK1       | NFAT5      | NFAT5      | PDK1       |         | MESP2      | NUDCD1     |
| PDK1       | FCGR2B     | TFAP2A     | NLGN4Y     | NLGN4Y     | PRDX2      |         | MICAL3     | NUFIP2     |
| PTGER4     | GIPC2      | TUSC3      | NOX1       | NOX1       | PTGER4     |         | MID1       | OPRM1      |
| PTPLAD2    | GIPR       |            | NRCAM      | NRCAM      | RFXAP      |         | NFAT5      | PDK1       |
| RPGRIP1L   | GPD2       |            | NUDCD1     | NUFIP2     | RPGRIP1L   |         | NUFIP2     | PRDM11     |
| SDK1       | KANK1      |            | NUFIP2     | OPRM1      | SETD3      |         | PDK1       | PTPLAD2    |

| miR-188-5p | miR-203  | miR-202-3p | miR-101-3p | miR-139-5p | miR-212-3p | miR-210 | miR-424-5p | miR-9-5p |
|------------|----------|------------|------------|------------|------------|---------|------------|----------|
| SLC8A3     | KCNG3    |            | PRDX2      | PDK1       | SLC8A3     |         | PTGER4     | RPAP3    |
| TRMT11     | MEFV     |            | PTGER4     | PIWIL2     | SLITRK5    |         | RNF149     | RPGRIP1L |
| VASP       | MGST1    |            | RFXAP      | PTPLAD2    | TMEM64     |         | RPAP3      | SDK1     |
|            | MICAL3   |            | RPGRIP1L   | RFXAP      | TRAT1      |         | RPGRIP1L   | SETD3    |
|            | MID1     |            | SEC24B     | RNF149     | TRIM23     |         | SDK1       | SLC8A3   |
|            | MOSPD1   |            | SETD3      | SCHIP1     | TUSC3      |         | SEC24B     | SMYD3    |
|            | NFAT5    |            | SLITRK5    | SDK1       |            |         | SETD3      | TRAT1    |
|            | NLGN4Y   |            | TFAP2A     | SETD3      |            |         | TFAP2A     |          |
|            | NRCAM    |            | TMEM64     | SLITRK5    |            |         | TRIM23     |          |
|            | NUDCD1   |            | TRIM23     | TRIM23     |            |         | VASP       |          |
|            | NUFIP2   |            |            | TUSC3      |            |         |            |          |
|            | PDK1     |            |            | ZNF555     |            |         |            |          |
|            | PLEKHG5  |            |            |            |            |         |            |          |
|            | PRDX2    |            |            |            |            |         |            |          |
|            | PTGER4   |            |            |            |            |         |            |          |
|            | PTPLAD2  |            |            |            |            |         |            |          |
|            | RFXAP    |            |            |            |            |         |            |          |
|            | RNF149   |            |            |            |            |         |            |          |
|            | RPGRIP1L |            |            |            |            |         |            |          |
|            | SCHIP1   |            |            |            |            |         |            |          |
|            | SDK1     |            |            |            |            |         |            |          |
|            | SEC24B   |            |            |            |            |         |            |          |
|            | SETD3    |            |            |            |            |         |            |          |
|            | SLITRK5  |            |            |            |            |         |            |          |
|            | TMEM64   |            |            |            |            |         |            |          |
|            | TRAT1    |            |            |            |            |         |            |          |
|            | TRIM23   |            |            |            |            |         |            |          |
|            | TUSC3    |            |            |            |            |         |            |          |
|            | VASP     |            |            |            |            |         |            |          |
|            | ZNF555   |            |            |            |            |         |            |          |
